# Supplementary material for: Cadherin switch marks germ layer formation in the diploblastic sea anemone Nematostella vectensis
Source: Oxford University Press journal article supplement (doi:10.1242/dev.174623), 2019-01-01
Supplement: dev174623supp.pdf [file dev174623supp.pdf]

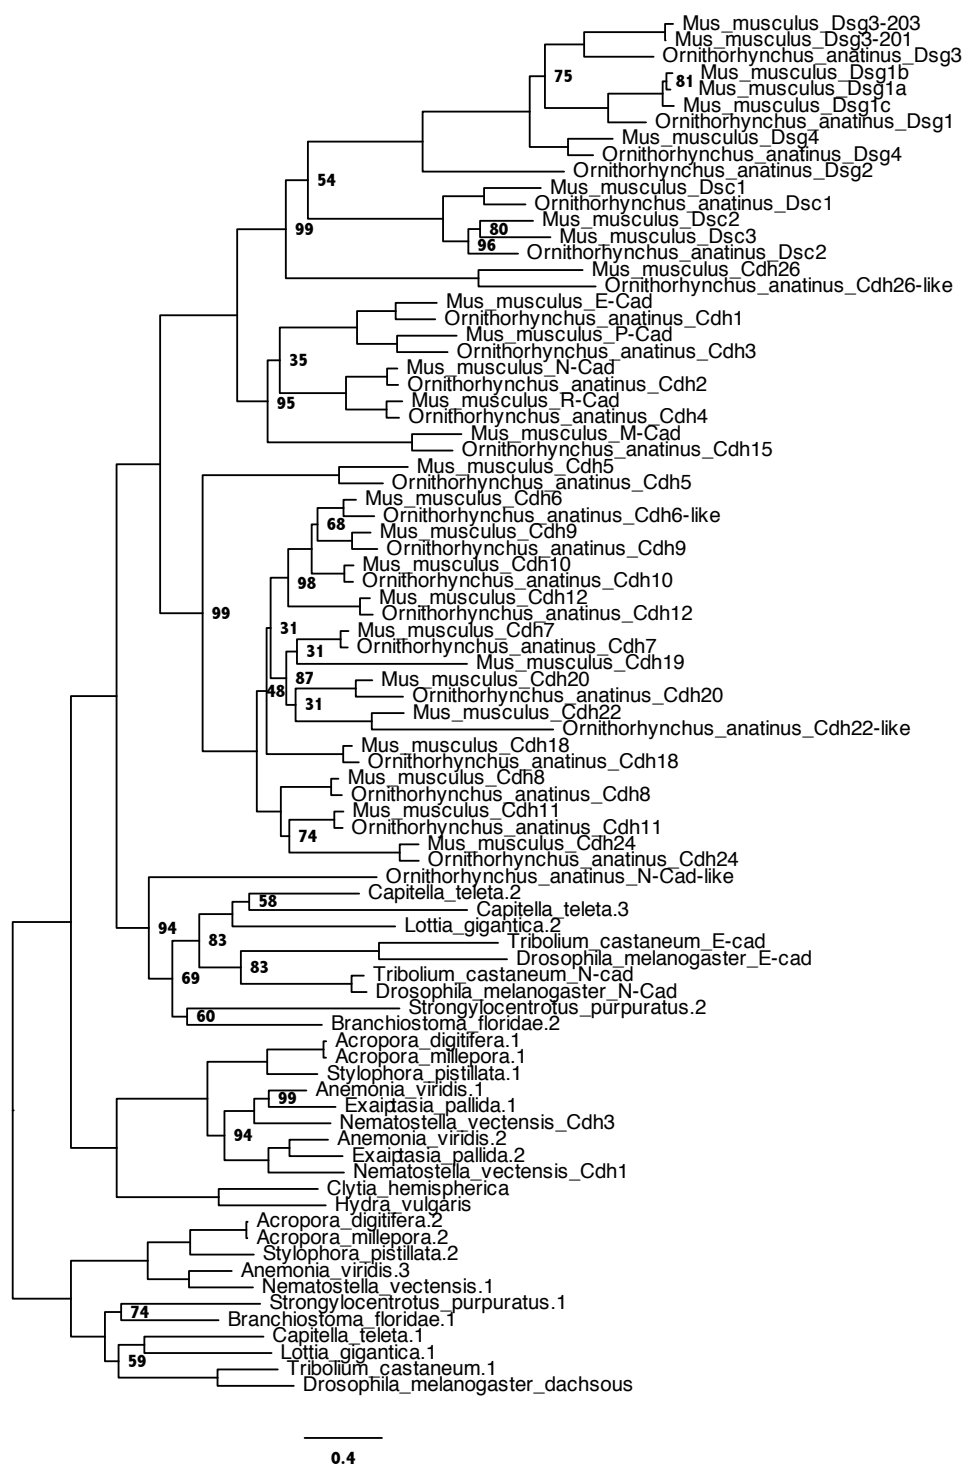

**Fig. S1. Phylogenetic analysis of classical cadherins. Extended version of the tree in Fig.1.** Dachsous cadherin proteins were used as an outgroup. The phylogenetic tree was constructed with the maximum likelihood method in IQ-tree. The number at the nodes indicates the bootstrap support from the maximum likelihood method.

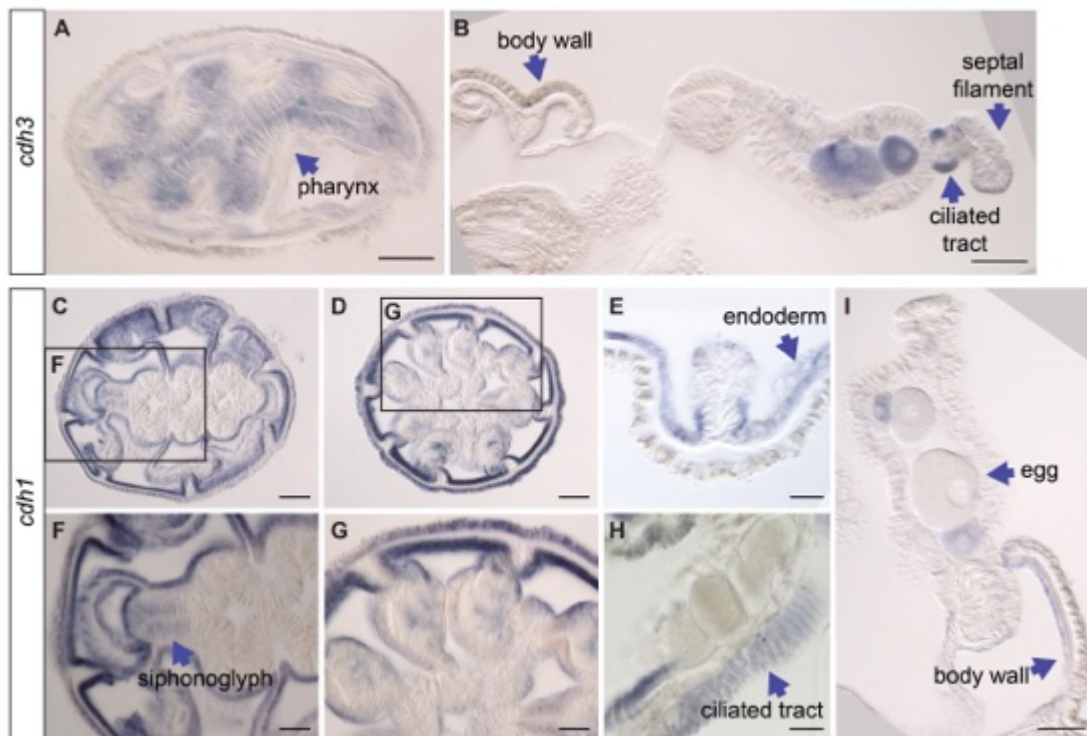

**Fig. S2. *cdh1* and *cdh3* expression in adults and juveniles.** (A-B) *cdh3* is expressed in the ectoderm of the pharynx, septal filaments and ciliated tract and in the oocytes. (C-I) *cdh1* is expressed in the endoderm, ciliated tract, ciliated lobe of the pharynx – siphonoglyph and small oocytes. Scale bar A-D, I: 100  $\mu$ m. Scale bar E-H: 50  $\mu$ m.

|      |                                                                           |     |
|------|---------------------------------------------------------------------------|-----|
| Cdh1 | MSAGRLAAVLTTPLLFLLSLLKTFQLAKAQDTLIEVNFDEGRPARSSVYLFDS-SGDVFS              | 59  |
| Cdh3 | --MGLDGSASLGFVLVFTLLSLLTITGHAQTIESASVPENEPEGFRVFSFPSPSNEIYS               | 58  |
|      | * . . . * : : : : * . . . : : * : * . . . * . . * * : * * * * : : * *     |     |
| Cdh1 | LYQA---DPTVPLLFQISEVGHVTSTQEIYEIIGKTNKYDLTVLQRPGETLGGIAITL                | 115 |
| Cdh3 | FFRALDTASQSALRLFDISEDGVVTKNPLVYTDGEENLYVLTVLRQRGMTEGGIAWTL                | 118 |
|      | : : : * . . . * : : * * * * * * * * * * * * * * * * * * * * * * * *       |     |
| Cdh1 | RITILDVNNFHPVFQSQGEHYEGFVKEGTAENTIVEGLEQCHATDRDTSGIRGYSIISG               | 175 |
| Cdh3 | RITVTDTNFQPTFGA--DLYLGYIAEAAQGTTVGGLEKCHAEDKDRSGIDRYEIVSG                 | 175 |
|      | * * * : * . * * * : * * * : * * * : * * * * * * * * * * * * * * * *       |     |
| Cdh1 | NEKGYFKVETVQIGSGVTSRKFLVLKTTGKPIVRDDNNPYIMLTVQVTDGGNPSHSGTAN              | 235 |
| Cdh3 | NERGYFVAETKTVG---AQKFLVLKATNTRIVRDPARPSITLTVRANDGGGL--HGTR                | 229 |
|      | * * : * * * * . * * * : * : * * * * * * * * * * * * * * * * * * * * * *   |     |
| Cdh1 | IRVNVEDANDQTPVFESSQYRETAENTPIQTSVLRVRATDKDDGTNGGIYYMKNPVNS                | 295 |
| Cdh3 | IQIDIQDTNPPVFQSEYTVTVGEDTPVMTSILRVRARDADIGRNGGIYYLRNTQ--                  | 287 |
|      | * : : : : * : : : * * * * . * * * * : * : * * * * * * * * * * * * * * * * |     |
| Cdh1 | YFTIDAITGVIRVAKTLDYNARDKHTLYISARDRGDPPTSAAEATVEISLRENIQGWPLP              | 355 |
| Cdh3 | DFTIDAITGVIRPRLMLDFQSQQRTLEVLTARDRGSSPKAA-NVNVQVTRSDISGYPPV               | 346 |
|      | * * * * * * * * * * * * * * * * * * * * * * * * * * * * * * * * * * *     |     |
|      | <b>Cdh3 antibody 1</b>                                                    |     |
| Cdh1 | DS--ADPKENTKPYFP-QSRYTFSIREDFPPKALLVMRAADNDPIGPNKRLRYSLSGNG               | 412 |
| Cdh3 | VVPSSSDRNRPPVFEKSSFTLSIREDFPVNGAIQVVKANDPDAGSTNGQLRYSLSGN-                | 405 |
|      | : . . . * * * * * * * * * * * * * * * * * * * * * * * * * * * * * *       |     |
| Cdh1 | VSKFAIDPESGVVTLTDSVDYENTPNNHVDLTVTATDQ--GPGSLSATTQLLIEIQDVD               | 470 |
| Cdh3 | --NNFAIDSTSGVVTLQTQLEYKGNPAQDVIDLVVATDRNGQSGALSASVNLKIEVLDVD              | 464 |
|      | . : * * * * * * * * * * * * * * * * * * * * * * * * * * * * * * * *       |     |
| Cdh1 | ENKNSPRFDPQQAILEISENLKQNSLVTTVSATSDSDSVGNPSSPDGKVVYSIVGGTGLGV             | 530 |
| Cdh3 | DNNAPVFNPPQLELTVSEDSAVGRTIRRVSATDSD----DGSDGQVVYSIIQSGGLGV                | 519 |
|      | : * : * * * * * * * * * * * * * * * * * * * * * * * * * * * * * *         |     |
| Cdh1 | FRVDSNTGEVKVAVPSLDREGTSQYTLVVKASDNATFPRSSRLFLMINLLDEDDNFPYFS              | 590 |
| Cdh3 | FQVQATTGDLIVAAP-LDREKMSFYDLVIKAEDKATFPKSSNLYVMVKIQDVEDHFPQFT              | 578 |
|      | * : * : : . * * * : * * . * * * * * * * * * * * * * * * * * * * * *       |     |
| Cdh1 | QPIYIAQVPENQPSGTFVTVVVGRADEGFNPSYTVITPGVPYKIEPSTGVIRTSLDQ                 | 650 |
| Cdh3 | QPMYYAKAPEKSPENTFVTVVVDHDLGESVSYSI-TGASSFKIVPTSGLILTTGPIDL                | 637 |
|      | * * : * * : * : * : * . * * * * * * * * * * * * * * * * * * * * *         |     |
| Cdh1 | SEL-STRELQVIV-RVSTAGSKTADGQVNITVISKVNRPPVFKNTPYSVKVPEEMGPLPN              | 708 |
| Cdh3 | TTEPSTYELVVTATSTNYGTTKRATGQVNVEITSKTESPPVFKNTPYAVSVPENQGSIAN              | 697 |
|      | : * * * * * . . . : * * * * * : * * . : * * * * * * * * * * * * * *       |     |
| Cdh1 | LFCIAAVDSLSPVQYTLAPGADGLFEVDKDSGRHLTKNSFNENVDRYNLRIEARTSSV                | 768 |
| Cdh3 | LVCVAAIDTKGQPVYIYSIESRG-EPFGIDSKSGRFSLSQSFYETADKYRIQISAQSGTA              | 756 |
|      | * . * : * * * : . * * * : . * * * * * * * * * * * * * * * * * * * * *     |     |

**Cdh3 antibody 2**

|      |                                                                                   |      |
|------|-----------------------------------------------------------------------------------|------|
| Cdh1 | QEVA--SASLTVEVTEEKDLPKFSSDSYQLTVDESAAAGTTLAPGLLIIDSDTSSDQFDC                      | 826  |
| Cdh3 | PNIMTSSSDVAITIKDEKDPQFSQSEYKVSVPEDASVRSTLSRGIRFVDEDTLSTQLEC                       | 816  |
|      | : : * : : : : : : : * * * * * : : * : : * : : : * * * * * : : :                   |      |
| Cdh1 | SMEAITSLHTLYNFEVTQQSGRCFLRVQAGGKLD AHLASKYTFNVRATDRNFRNMFATAQ                     | 886  |
| Cdh3 | SMEEMTSRIPLDYL SVVQDGGECKFVIE--KTLDTFVASKFTFDMKVTDKNFPGMFATK                      | 874  |
|      | ** : * * * : : * . * . * . * . * : : : . * : : * * * * * : : * * * * * : :        |      |
| Cdh1 | VEVNVIDVNDHKPEFLQESYWLSVPSSTPAGSSLVTVQAEDMDIGTNAQVRYELLRQEN-                      | 945  |
| Cdh3 | VEVTVTDNTNTYTPVFSRTSFWASKPDTLPTDTSVMQLSII DKDMGSLGEVTYQLIDPTVS                    | 934  |
|      | ** . * * * : . * * * : * : * * * . : * : : * : : : . * * * : . * * * : :          |      |
| Cdh1 | -----SERFILNDNNQLSTASTLTPNVRYQLLIRASDSATRNPSSAQVPVYVSVYSPSE                       | 999  |
| Cdh3 | AGETSGYDRFRVDDSGMIESTNILTANTLYKLQAKAKDGGSPALEATVDVFISVYPSD                        | 993  |
|      | : * * : * . . : : : . * * . * : * : * . * : * . * . : . * * * : * * * * * : :     |      |
| Cdh1 | SPIVFDKSSYNQNL PEDSSANTLVFTAKATRSGSSSGITYELVGGYKQIGEAMFSIKPDT                     | 1059 |
| Cdh3 | TPVRF SQNPYSASIAENSPLNTEVFRATATKSGSSSGIAYSLVGGQIENGNTMFSIDS-S                     | 1052 |
|      | : * : * . : . * . : : * * * * * * . * * * : * * * * * : : * * * * * : :           |      |
| Cdh1 | GQVYL IKKLD FETKSYFPIAVRAKYSGGAI ELASEVVAKVTV DVNDNGPRFAFHESKST                   | 1119 |
| Cdh3 | GRVLLLRLQDRERTKSYKLYVRGTYTGGSLTLATDVECLVTVTDVNDNTPLFTFDRV NKQ                     | 1112 |
|      | * : * * : * * * * * . . : : * . * . * : * * * * * : * * * * * * * * . * * . . * * |      |
| Cdh1 | VVIDSFSAKDTQLVQARALDADSGSLGEVTYGIDGGRSTSNLFPNINVKTGMIFATREIL                      | 1179 |
| Cdh3 | FVVDNYAPANTI IATLRAVDSDEGANAQVTMSIQGT-VPSNAPFTIDTPSNVLKTTTKLS                     | 1171 |
|      | . * * : : : : * : . * * * * * . * : : * * * . * * * * * . : : : : * : : :         |      |
| Cdh1 | YTQGS SYIIIVVATD GATDGSQKIQKFTVNVQVLDTPRPPSFPQKTY SAPVTETAGVGD T                  | 1239 |
| Cdh3 | --TVIDYQITVRATDKG--SPPQYSETTVIVKVLNIQTTPVFGQAKYTVDVQENTKVGQQ                      | 1227 |
|      | . * * * * * . . : : * * * : * * * * * * * * * . * * . * * : * * : * * :           |      |
| Cdh1 | VTTVRAVYKPN AFLKYTFVSGNEDNTFCVNGFGIISVAKSLDREKVAGYTLGMRVTLGQ                      | 1299 |
| Cdh3 | VISVKATYGD SNGLLQYSFVSGNLGDAFCIDSSGQITVAQPLDREVLPSYTLRVRVALGN                     | 1287 |
|      | * : * * * . . * . * : * * * * * * * : * * * : * * * * * * : . * * * : * * * * * : |      |
| Cdh1 | HVDDTTVYVNLTDINDDAPHFTSAIYRRS I KEGLAEDTEILPPVIAVDHDFG SNGKILYS                   | 1359 |
| Cdh3 | NEDFTEV FVSLTDINDDSPTFTKSVYEFFANEDISSGTS-IGKVAATDRDSGSHGQISYR                     | 1346 |
|      | : * * * : * . * * * * * * * * * : * * : : * . : * * . * : * * * * * * * *         |      |
| Cdh1 | ILSGVHPDWDK YFNIDSATGKIT--TKMTLDYETHKSHTL FIRAEDNGSPKRLSGIAQVD                    | 1417 |
| Cdh3 | FLYASDIQSMDFDL DQTTGIIISLASGSLDYEDISMHVLFVRAEDNGAN-KLSAIAEVR                      | 1405 |
|      | : * . . : . * : * . * * * * : : : * * * . * . * * : * * * * * : : * * . * * * :   |      |
| Cdh1 | IDVIDRNDNSPVFAAAFYRAKISLGAVKGT SVLQVHATDLDSGQNGQITYSIIQGN EEEA                    | 1477 |
| Cdh3 | IYLRDINDNDPKFSAASYHAKLSLDAPVLEHVQVTATDLDTANNGRIRYSIVAGNQEGA                       | 1465 |
|      | * : * * * . * * * * * * * * * * * * * * * * * * * * * * * * * * * * * * * * * * * |      |
| Cdh1 | FTI-NEQGVILVDKSLTTVAADKFS LKVEARDKNASPRSGSVTVEINVYLPDGP PMFVVS                    | 1536 |
| Cdh3 | FQVLT DNGLIRVAKSLTTVAASSFLLTLEAADSGDPERKGSVNVQVNVFLPDGPPKFVLD                     | 1525 |
|      | * : . : * : * * * * * * * * * * * * * * * * * * * * * * * * * * * * * * * * * * * |      |

|      |                                                                                                                                                   |      |
|------|---------------------------------------------------------------------------------------------------------------------------------------------------|------|
| Cdh1 | PVTVYVKEGVPANHRVAGVKAATSEALTYTLLSGNEAGMFRINPSTGSLDATRELDYEER                                                                                      | 1596 |
| Cdh3 | PVIVNATEGIAANQRVAVAKAATSEALKYEILSGNTNDMFAINPSSGVILTTRELDYEEA<br>** * ..** : ** : *** .***** . * : **** . ** ***** : * : *****                     | 1585 |
| Cdh1 | RRYELKIEARDTRDRSAMVELIIIVVNINDNKPTFVDIVDGQIDRKAIGTCSPTDIAEGE                                                                                      | 1656 |
| Cdh3 | TGYIMNIIARDTRDRSASVQVIINVVNINDNEPMFPGETNGQIDRKVAGPFAPGFI----<br>* : * ***** * : * * ***** : * * . . : ***** . * : * *                             | 1641 |
| Cdh1 | VITRLGAFDRD-GDEITFIVPDDVKDLFKIDSRGVVTAKKPIEDLPKIYFPNVKALDNGE                                                                                      | 1715 |
| Cdh3 | -ATRLTAVDKDIGDRVYKISIEAENYFTIDERGQLICKNDLKGIASPFRFTIEARDGGL<br>*** * . * : * ** . : : : : . : : * . ** . ** : . * : : : . : * . : : * * . *       | 1700 |
| Cdh1 | PPQETDVKVRLVVFHYRPDQKHVRVNVREDTPTGSVIATVRRYFPNGIVSLLLPEKANFS                                                                                      | 1775 |
| Cdh3 | PQKVHTANVLLVFKYRPKQPVRVTVPETTRAGTVITRVPRYFPPTGEFSIVYPENTNFT<br>* : . : * ***** : *** . * * * : * : * : * * ***** . * . : : * : * : * :            | 1760 |
| Cdh1 | VRANGDVILLTPLDYESQQFHRMTVREEL--GNQTNVDVDEVVVLDVNDNRPIWMERERL                                                                                      | 1833 |
| Cdh3 | IDNDGNVTLNRPLDYEEIAFTLITVREKQASGPLENYIDVEITVLDVNDNAPVFTMISTL<br>: : * : * * ***** . * : ***** : * * * : ***** . ***** * : : . *                   | 1820 |
| Cdh1 | ARVNTNSRAGAQVYQLEARDEDDGSSGLVGYQLKSPSNDAKRKRSPQHPFTINPKTRQ                                                                                        | 1893 |
| Cdh3 | GRVNSNSRAGATAFQLQARDLDSGNSGLIGFQLENIP-----TLFMINPLTRQ<br>.*** : ***** . : *** : *** * . ** . ** : * : * : . * * * * *                             | 1868 |
| Cdh1 | MEVAG-SLKDQRYDLDFVAFDYGIPRLTSDTITLNVDSAGQQLPPRFKVSYHFMVSED                                                                                        | 1952 |
| Cdh3 | IEVGQPRQLTSRYGLDIIIPFDYKPSVNGTKATVDIE--TVQSPPVFNESYTFTVSER<br>: ** . * : . ** . ** : : ***** * : . . . * : : : : : * * * * . : * * * * *          | 1925 |
| Cdh1 | AKYLSLVGII LARSISGARLDYKIVSGNVGDKFIAMGDGRILLNSLLDFERDQTQYNLKV                                                                                     | 2012 |
| Cdh3 | APTMTKIGDVTAVSVSGARLSYTIIEGNTGDKFLAKDNGDIVLNSLLDFERDQSVFNLKV<br>* : : * : * * : ***** . * . : . ** . ***** : * . : * : ***** : : *****            | 1985 |
| Cdh1 | KATEQIPDGLDSTVDVKIDVINANDHFPYFDQQLYSVQIPESTAVGVLVQEVTAKDCDCL                                                                                      | 2072 |
| Cdh3 | EAKEQIPKGLSSEVDVTITVINANDHFPYFDQQLYSVQIPESTAVGVLVQEVTAKDCDCL<br>: * . ***** . ** . * * * . * ***** . ***** : * : : : ***** . ** : : ***** : ***** | 2045 |
| Cdh1 | SSCTCSPGFLTYISIEPSKEQGGKFYIDPATGKISVSVVALDYEDQRYHLLKVYATDKGKKS                                                                                    | 2132 |
| Cdh3 | SDCTCQVGLKYSVEAG---TSFD-IDQTGAIVVARTLDYETSKVQLKVMASDQGEKV<br>* . ***** . * * . ** : * . . * * * * : : ***** . : : ***** * : * : *                 | 2100 |
| Cdh1 | FQGLCFVNVTLTNVNDNRPTFLKSAYEFRVAEGAATGESLAIVVAVDADGDAVT---YSK                                                                                      | 2189 |
| Cdh3 | FTAVTFVVTLEDTNDNAPVFKRNDYLFRTADASTGSMIGAVIARDQDQDDIEKVRYSV<br>* . : * * * * * : . ***** . * : . * * * : . * : * . . : * * * * * : * *             | 2160 |
| Cdh1 | AGGALQFSVDQSTGVITLNSALDP-NKNQYTLQVMAKDSGGLTSTVSVTFNVADANNVNP                                                                                      | 2248 |
| Cdh3 | VS-GTEFNVNTEGTGLTVAKDLSTGAKSEYSMEIRATDSTK-SNDARVRVNVEYKNMYRP<br>. . . : * . * : . ***** : . * . * . : : : : * . ** . . . * . * * * * *            | 2218 |
| Cdh1 | QFTNCGTVSIRENDPRDTKITQLTATDADRQNGQITYSIEDASSQTLFSIEPRTGVVRS                                                                                       | 2308 |
| Cdh3 | EFTKCGKATIQENLLKGQLIATVTATDRDQGRNGEVEYKIVPVGQDFFFTINNKTGEVIT<br>: * : * . . : * : * * . : * : * : ***** * : * : * : * : * : * * * * : * * * * *   | 2278 |

|      |                                                                                                                                                    |      |
|------|----------------------------------------------------------------------------------------------------------------------------------------------------|------|
| Cdh1 | LTSLDRENKDSYNAI IKAEDGSSKQDESERLLWYCYLTINVEDVNDNRPYFLAAKYFGSV                                                                                      | 2368 |
| Cdh3 | TSSLDRETKATYTVI IITAEDGGHGKDPARLMSYCFLEVEVQDVNDNYPFITRAYLGS I<br>:*****.* :*..**.****. :* :***: **:* :*:***** * *:: *::**:                         | 2338 |
| Cdh1 | FSSAPNGSNILTVQATDADSGSNAKIKYALLDSAGGLFRLDSSGILRTNTNPARLQLETG                                                                                       | 2428 |
| Cdh3 | QNTKPIGTSVLTVSATDPDAGDNAKITAFKSPNDKFEIDSTSGDIRTKVALTGTK---D<br>. : * * : : : **.**** * : * . **.****. : . . : . : ** : ** : . : : .                | 2395 |
| Cdh1 | KKLLLEVSAKDVESIAGTQPGKPKTYTTQIEILVSNEEPPKFSQQVYTASINENMETGST                                                                                       | 2488 |
| Cdh3 | VNEKMTVVASNTEAIQGGDAN-NRDRETEVTIYITDLAPPVCDKNLFTARILESLSVNSD<br>: : * * . : . * : * : . . * : : * : : * * . : : : * * * * . . . . . *              | 2454 |
| Cdh1 | VTRITATSSTGAEISYENVDTNPRAKILFRVQPDGYIITGDRPDYERG---TTYNMQFA                                                                                        | 2544 |
| Cdh3 | VLKVSAQAPGGKSIVYSPVKANADIDEKFSVETNGQIKTASQLDYEQLSPGDKTFKLQVR<br>* : : * : * * . * . * . : * * . * * : * * * * . : * * * * . * : : * .              | 2514 |
| Cdh1 | AKDKKTLLYSTVKVVINIIDVNDVSPAFLLAINTRNARVLENKPAPTKVISMKAIDDDGS                                                                                       | 2604 |
| Cdh3 | AQEENTNLYSTCSVAITLEDVNDKPTFDLG--NYDARVRENAPIGTTVITIKATDRDTG<br>* : : : * * * * . * . : * * * * . * : * * . . : * * * * * * . * : : * * * * .       | 2572 |
| Cdh1 | EPHRRVTY--EMKDNPNFQIDASTGMITTKTTLTLDREVTPKYDVEVTAKDGVN-----KES                                                                                     | 2657 |
| Cdh3 | DAG-VVTYFLKAGSDEHFAIDVNSGTLTTKKSFDREGQSLFSVIVVIARDKGNP GALSEE<br>: * * * : . : : * * . : * : * * : : * * * * : . * * * * * * . *                   | 2631 |
| Cdh1 | AILYITVVDQNDQPPVFAPKSYAISVPEDSPIGTSVLDIYATDADVGENAKITYFISKGD                                                                                       | 2717 |
| Cdh3 | VAVKVLVVDENDSPQFDQAEFQTSVSESATIGTSILEVVATDQDIGDNAKLEYFISGGD<br>. : : * * : * . * * * . : * * * . : * * : : * * * * : * * * * : * * * * * * *       | 2691 |
| Cdh1 | PEGKFSIVTS---PVKGLVNGKLDKFETKSSYTLVETATDGKFSDTAVVTVTIQDVND                                                                                         | 2773 |
| Cdh3 | GRFWFAVQTISKGRTYGEVQVDARLDFETKSSYTDVTATDGRFSATTRVLITITDAND<br>. * : : * . * * : * . : * * * * * * : * * * * * * * * * * * * * * *                  | 2751 |
| Cdh1 | LPPVF-----SSPLYESRIQENTGPGAGVVMVTASDIDSPTISFSLDDRKDYFQIT                                                                                           | 2825 |
| Cdh3 | IVPFMFTLTPTLLSPIYTGRVSEMTGSGVEVLKVYAVDTDSPNIQYTLGSS-SYFTI-<br>: * : * * * * * . * : * * * * * . * : * * * * * * . : : : . . * * *                  | 2809 |
| Cdh1 | PIRASGPGNVWVDIRTGSKQLDREESPVKVFVTVIANDGKHTAQAEIRVNLTDVNDNAPR                                                                                       | 2885 |
| Cdh3 | --AARQEGGKFGVGIISTGSQPLDREATPIFSFNVLAKDGVHTGSAYIEINVTDINDNQPR<br>* * . : * * * * * : * * * * : * . * : * * * * * . * . : * * * * * * * *           | 2867 |
| Cdh1 | FPASPYIGYVEENKPSGTSVMYIQAVDDDDPLAGGNAKLSYELTDSAGDKFSIDPLSGLI                                                                                       | 2945 |
| Cdh3 | FPNSLYVGYVEENKAAGTSVMYVQAHHDDDDPYLGGNAEIRYTLTDNAGGKFKIDANTALV<br>* * * * : * * * * * * : * * * * * * * * * * * * : * * * . * . * . * * * . : . * : | 2927 |
| Cdh1 | KTKVTFDREQTPNKFKVRVKATDAGNPRLSASVDGIIHVSDANDHKPKFTEKFRGVSVAE                                                                                       | 3005 |
| Cdh3 | TTEEILDRETSFNSFTITVLATDQGANKLSTTKVATIYVTDANDHAPVFTKRIFRGTVSE<br>. * : : * * * : * . * . : * * * * * : * * : : . * : * * * * * * * * : : * * : * :  | 2987 |
| Cdh1 | NAPPGYSVLRVTATDEDVGPNAEFVVFVVQGNDPHAFYIDPFNGTVLVSGILDYEEKKEY                                                                                       | 3065 |
| Cdh3 | DVRPGYVVTVSATDTDGPNAELEFVVTHGNEPAAFYVDPSKGTVHVSGILNYTLRKS Y<br>: . * * * * * * : * * * * * . * * * * * : * * : * * * * * * * * * * * * * * * * * * | 3047 |

|      |                                                                    |      |
|------|--------------------------------------------------------------------|------|
| Cdh1 | TITLTVADRGMPLQGDDETAYVVEILDANDNAPEFIPKIYNASVLEDVGARQPVLTVTA        | 3125 |
| Cdh3 | NLTVTVSDRGMPLVSDNSPAYVLITITDANDNAPIFIPNQYNKTVAEEDLAVGSPVVVTA       | 3107 |
|      | .:*:**:*:** * .:.* **:* * ***** **: * * * * .:.* .:.* **:          |      |
| Cdh1 | VKDSGPNGNFTFAIDPRSDPDDAFTIEPNPNNASIGIIRTRVPLDQEKTPSFHLKVTAT        | 3185 |
| Cdh3 | VDYDSGDNAKFVFDITG-GNPDDLFEVVPNPDPNSSLGIVRTRLPLDRETTPIHLEITAK       | 3166 |
|      | ** ** * .:.* * * .:*** * : **:*:*:**:*:**:*:**:* * .:.* .:.* :     |      |
| Cdh1 | DAGGLQGEGERINVIDVNDNGPWFVPPFFVQGQIKEGVSARQFVTKLKAYDPDAFVKDQV       | 3245 |
| Cdh3 | DTGGLTGKAHVWLTLLDVNDNGPWFQPPFFVQGIKENVNVKQFVTKVSANPDPTKNGAP        | 3226 |
|      | *:** * .:.* * .:.*:**:**:** * **:*:**:* * .:.*:**:.* ** * : :      |      |
| Cdh1 | ITFSIYNGTVGENFKLDPVSVTNEVDLHSYGVFDREAAPVWKIGIEAVDNGPKPKQNF         | 3305 |
| Cdh3 | FTYAIYNGTVSGNFADFIATITNVTTDMSSSGTFDRETTTWTIGIAGTDS-GRPAKSNF        | 3285 |
|      | :*:**:**.* ** * * .:.* * .:.* * * **:* * .:.* ** .:.* * .:.* :     |      |
|      | <b>Cdh1 antibodies 1 and 2 (against extracellular domain)</b>      |      |
| Cdh1 | TYVYVDVLDVNDNAPKDGSLLIIVNAYDGNFTGGVIGKPYQDDDFDGDENTYELNSQSP        | 3365 |
| Cdh3 | TYVYVDVQDDNDNEPCDGRMTIIVNSYNGKFRGGPIAKTYIRDADYDGDVNTYTLQSQTG       | 3345 |
|      | ***** * ** * * * : **:*:*:** * * .:.* **:* * ** * ** * * * * :     |      |
| Cdh1 | GSYFRVNEGNGDITAAPMIPMGEYNLKIRVTEK-----DSPSTVTSSVRVLVRR             | 3415 |
| Cdh3 | GNFTVDTTTGEISAAKDI PVGEYSLVISVTEVNTGNPPRANEVNFPKVTISRATVIVRD       | 3405 |
|      | *:** * * : .:.*:** **:*:**.* * ** * : * .:.* ** .:.* :             |      |
| Cdh1 | IDKEAVDNGVAVEFTDMRKVGYFVGDYKGFEDVLASTLGVPTGDIKIFSVQKAHDNGLA        | 3475 |
| Cdh3 | ITSKAVSNSVALQISDMRKVEYFVGDYHDVVVVELSRMFGVSSSGIEVFSVQPSPIKUMA       | 3465 |
|      | * .:.*.* .:.*:**:**:** **:*:**.* .:.* * : ** * .:.*:**:** * : : *  |      |
| Cdh1 | VVVFFT-VAAKDSYMPHWDVSVKLVDAAKPLESLGLKVSRLGMDECSKGNVQSVGVAKN        | 3534 |
| Cdh3 | LDVQFAVKTGSDYEYTKPYDVIRVVTNDRERLTLNLGLKVTSTIGIDMCALER--ERVGKGIN    | 3523 |
|      | : * * : .:.*.* **:* :.* : * .:.*:**:** * * : .:.* * * .:.* *       |      |
| Cdh1 | ILVRSSNFSVASGDYGVKVPAPASSLTIVSIDILPKCLYEAVFPPEKRCRPHNPCLHGGKC      | 3594 |
| Cdh3 | VVETSSAYKIASGDYGVKVPAPASSITLVSMDDVLRDKYVTIIEPGKNCNENPCLNGGTC       | 3583 |
|      | : : ** : .:.*:**:**:**:**:**: : * : : * * .:.* .:.*:**:** * :      |      |
| Cdh1 | YETVPDCPGFVCKPTGYHGPLCEMTTRTFYGNYSIWLPKLMTYSLSDLEFEFMKTADG         | 3654 |
| Cdh3 | HDTVPAQ-WRVCQPRGYRGPHCEQTRTRFRGTSYIWLPKLTAYDIRELSFEFTTEFKDG        | 3642 |
|      | ::** ** **:* **:* ** * ** * * .:.*:**:** * .:.* * * * : ** * :     |      |
| Cdh1 | LLVYQGPREGANGLKDFIAVVLRRGGRVELFVSLGLDPVTVKMDKGPRLDDGEWHTVQV        | 3714 |
| Cdh3 | LMLYQGPLKPGDNNGAKDFLAVFLDEGLVVRVSLGYEPITINMTRRPNLNDKEWHTVQI        | 3702 |
|      | *:**:** : * ** **:*:**.* **:* : ** * : **:* : * .:.* ** **:* :     |      |
| Cdh1 | LRNMKD---IEI IIDRCSTALLEHKPDGTVVENRKSCHVYGRMLGRSVFLDGFGLQIGG       | 3771 |
| Cdh3 | IRDVIDRKMIRVIIDRCQSAQIV-EENGRVFEKRDTCETGRVKGRSVYLNFGPLQIGG         | 3761 |
|      | :*:* * * .:.*:**:**.* : : * * .:.*:**:** : ** * **:*:**:**:** * :  |      |
| Cdh1 | VSNPNMDFPDIPYTGFKGCVRNIKDNHNLVDLKNPLKVVNAPEGCQLASACPE-CKNDGY       | 3830 |
| Cdh3 | VET-DLTFIGITTTGFRGCIRNIIDTEKMYDLRNPVKVVNAPEGCTLAGTCPNNCNDKGY       | 3820 |
|      | * .:.* : * .:.* **:*:**:** * .:.*:**:**:**:** * .:.*:** * .:.* **: |      |

|      |                                                                    |      |
|------|--------------------------------------------------------------------|------|
| Cdh1 | CEP-LMARDSICVCPNGYSKGKHCGRGKASYLLASSFTEYLVAARRRRREVVPPPTEIFN       | 3889 |
| Cdh3 | CEPSLMAGKSMCVCDLGYTGRACNDRSEANYYLENSFSQFLLTGIRARRELIQPPVPLMN       | 3880 |
|      | *** ** .*:***: **:*: *:.*:*.* ** .***:***: . * ***: ** . : **      |      |
| Cdh1 | RFYTTLALQVKLDEDATNVVFLASNRMGTEFQRVDVKDSKIRYVLRGARMVLVSFPQL         | 3949 |
| Cdh3 | EYYTHINLQVKLDPGKDCVLFSSNSLGTEFNRLDVKDHMLRYIFRLGDRMKVLSIPQY         | 3940 |
|      | .:** : ***** .:.*: **:*:* ***:**:* ***:** * ***:**                 |      |
| Cdh1 | NVTDGVYHSVIVRRHGDYAIMQLDYSGYVIGSLHSQRTLLDMSGGEIFSGGLPNITIVRI       | 4009 |
| Cdh3 | NISDGKYHSVMVNRREGNYAEMQIDYRAKMAGTTGGVQKLLNMGGGSIFTGGLPNITEVRV      | 4000 |
|      | *:** ***:**.*.*:* **:* . : * : . : **:*.*.* ***:***** **:          |      |
| Cdh1 | IEAIVENDGSAVISTNVRN---DG---DGYAAD-----                             | 4036 |
| Cdh3 | VEAIVQSGGDVILRTEDGKVLTSGIGVGGGMSFGAGSSVTLITIGSGVLTQRNILDSQSL       | 4060 |
|      | :***:..*..:.*: : . * . * : .                                       |      |
| Cdh1 | -----VGGVHVR-----N                                                 | 4044 |
| Cdh3 | FVRGIYKNGTVLYGSSSSSTFGMNVDDQGIPFKSSDTSSNGNGGVQISQGNPMTYGAGIQ       | 4120 |
|      | ***: : :                                                           |      |
| Cdh1 | LQLSGPLNLVSRKRRASGTVSVLGDFFGGCIAGTSVNGANMESDPSIKVHRQNVLDGCPCL      | 4104 |
| Cdh3 | WTLSNPGRTOVGAGNSGGAVEVIGDMEGCTATNRFQGVSLDSPDEVRRQNVKGCPCA          | 4180 |
|      | **.* . .:***:* ** * . .:*..*.* ***:** * ***                        |      |
|      | transmembrane                                                      |      |
| Cdh1 | SNFCANGGTCVDAMPYICAPGWTGPLCTIVVTAPPVGER-GTPFMHPAVIAIILLVML         | 4163 |
| Cdh3 | EGFCENGGTCVDGTPPYCLCSPGWTGPTCVLIVTAPNPGQRPGRVVSFFVIACVAVLL         | 4240 |
|      | ..** *****. ***:* ***:** *.* ** * : : * ** * : **:                 |      |
|      | region                                                             |      |
| Cdh1 | <u>AIFIIMGAVILKRRPEPVVYADSTDTGHVHDNVRLYHDDGGGEEDNLGYDITKLMKYTY</u> | 4223 |
| Cdh3 | <u>AVMVMGAVLLKRTPPPVI-PVMVEDGHVHDNIRPYHDEGAGEEDNFGYDITQLMKYTY</u>  | 4299 |
|      | *:***:***:* ** * : . : ***:** * ***:***:***:***:***:               |      |
| Cdh1 | <u>IETTIAPPSVAPSK-----ASEDKISTSSDQPLLO</u>                         | 4253 |
| Cdh3 | <u>VEGGYGGGGGYGGGGGYGDCTGGAAFGSAYAADGGGKGLSGVVEEVMVAEEKPLLO</u>    | 4359 |
|      | :* . . : . : : : **:                                               |      |
| Cdh1 | <u>GRPPDAV--FGLTGKEPGPKPKMEGDDVGDFITTRVKITDREVFVLADELHIYRYEGD</u>  | 4311 |
| Cdh3 | <u>GAMEGYQQHGIIT--ITRRMMNADSVVGNFINSRVGEADREYILSYDALHIYRYEGD</u>   | 4417 |
|      | * . .*: : : . ***:**:* ***:** * ***:** * ***:**                    |      |
| Cdh1 | <u>DTDVDLSEIEPDEE-DEEYEQEFDLQKQWGPKFKLAKLYEDVDE</u>                | 4356 |
| Cdh3 | <u>DSDIDDLSELGSDEGGDDAEQSFDFLQDWGRKFENLNKIYNLDD-</u>               | 4462 |
|      | *:***:***: ** * : : ***.***:*** ***:** * ***:** *                  |      |

**Fig. S3. Protein alignment of the full-length sequences of the Cdh1 and Cdh3.** Cdh1 and Cdh3 antibody epitopes and transmembrane protein regions are underlined and recognized with the colors. Transmembrane regions were identified with the SMART protein domain annotation resource. Alignment was performed with the Clustal Omega Multiple Sequence Alignment tool.



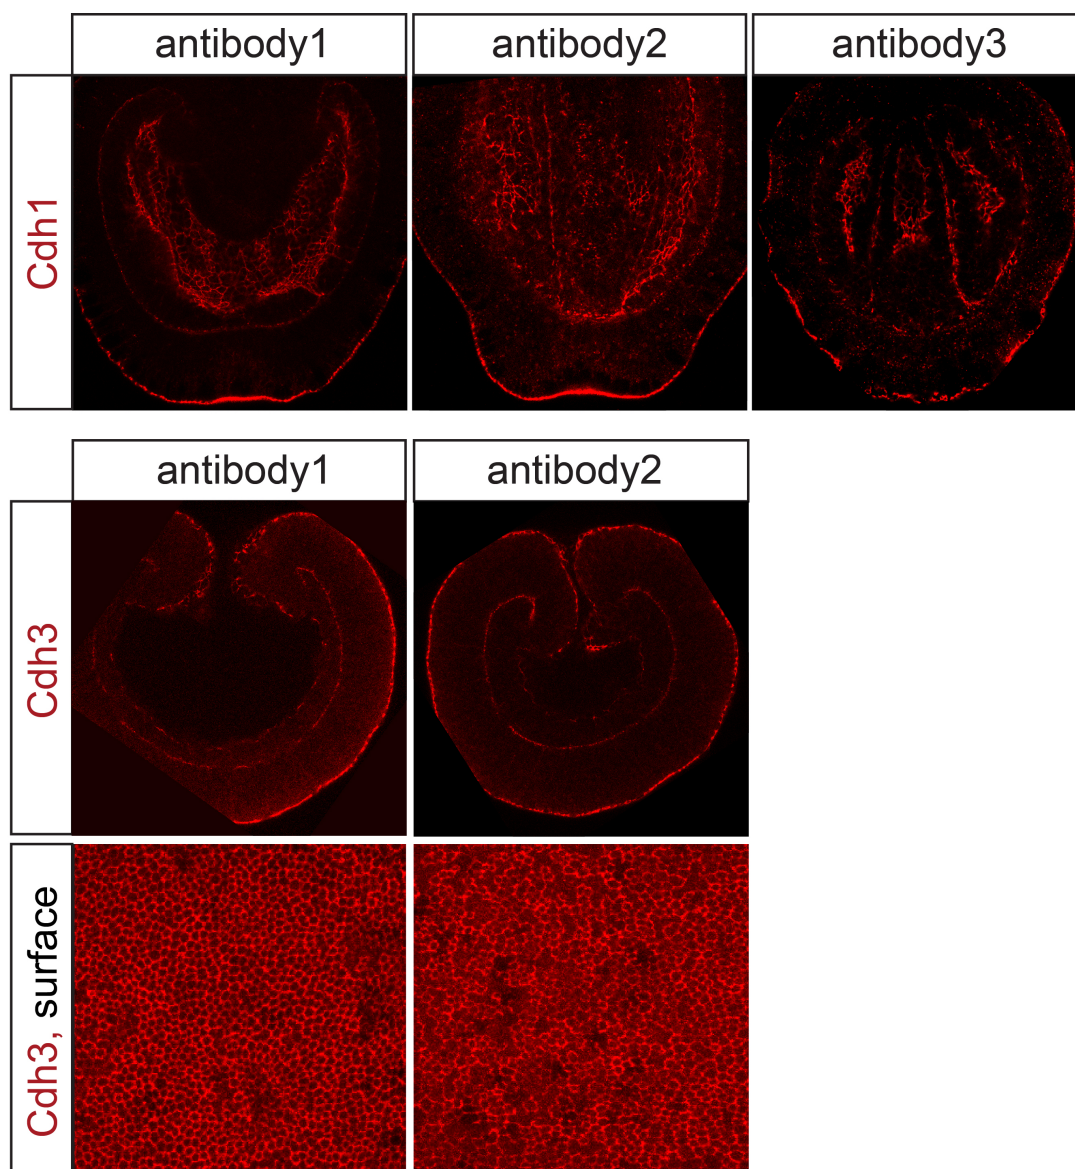

**Fig. S4. Custom antibodies generated in different animals against different protein domains result in the same staining pattern.** Cdh1 antibody1:domain1 (extracellular) and Cdh1 antibody2:domain1 were raised in rats; Cdh1 antibody3:domain3 (intracellular) was raised in a rabbit. All three custom Cdh1 antibodies show the same staining result. Monoclonal Cdh3 antibody1 and Cdh3 antibody2 were generated against different Cdh3 peptides and result in the same staining pattern.

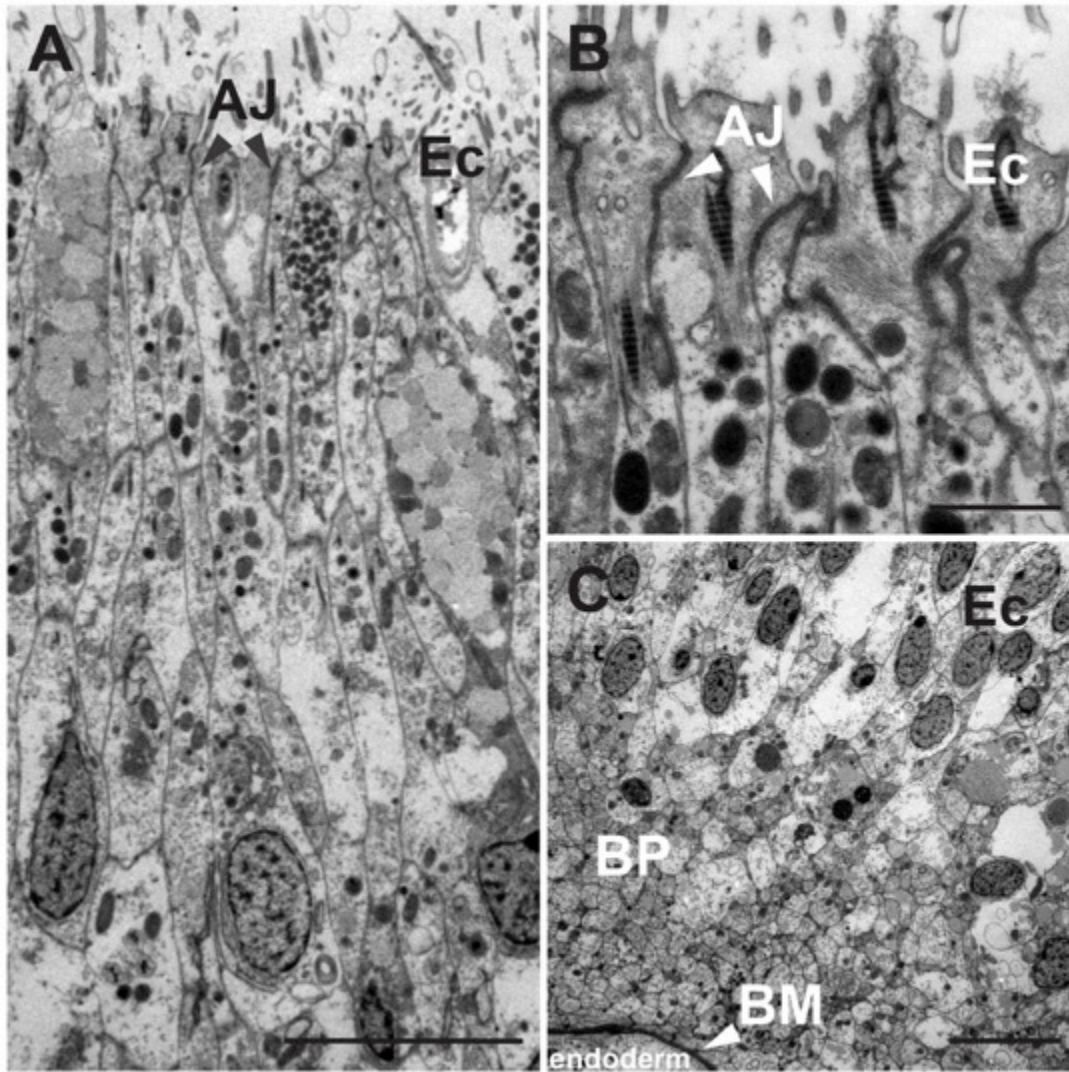

**Fig. S5. TEM of the ectoderm of the apical organ.** (A,B) Apical side of the ectodermal cells of the apical organ. (C) Basal side of the apical organ ectoderm. AJ apical junctions; Ec ectoderm; BP basal protrusions; BM basal membrane Scale bar A,C: 5  $\mu$ m. Scale bar B: 1  $\mu$ m.

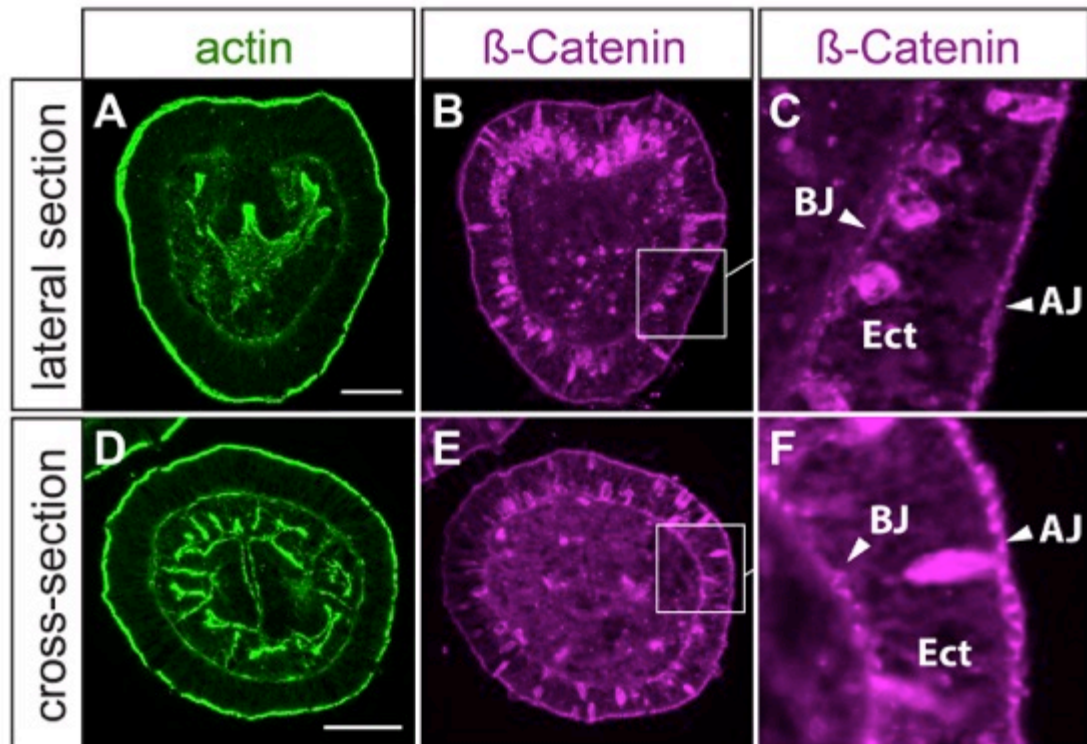

**Fig. S6.  $\beta$ -Catenin is localized to the apical and basal adhesion junctions of the body wall ectoderm.**  $\beta$ -Catenin antibody and phalloidin staining of vibratome sections of the 4 day old planula to exclude a possible penetration problem of the  $\beta$ -Catenin antibody. Please note that in vibratome sections, the  $\beta$ -Catenin antibody detects the basal junction in the ectoderm, but has a tendency to show unspecific staining in nematocytes and other subcellular structures. Scale bar 50  $\mu$ m.

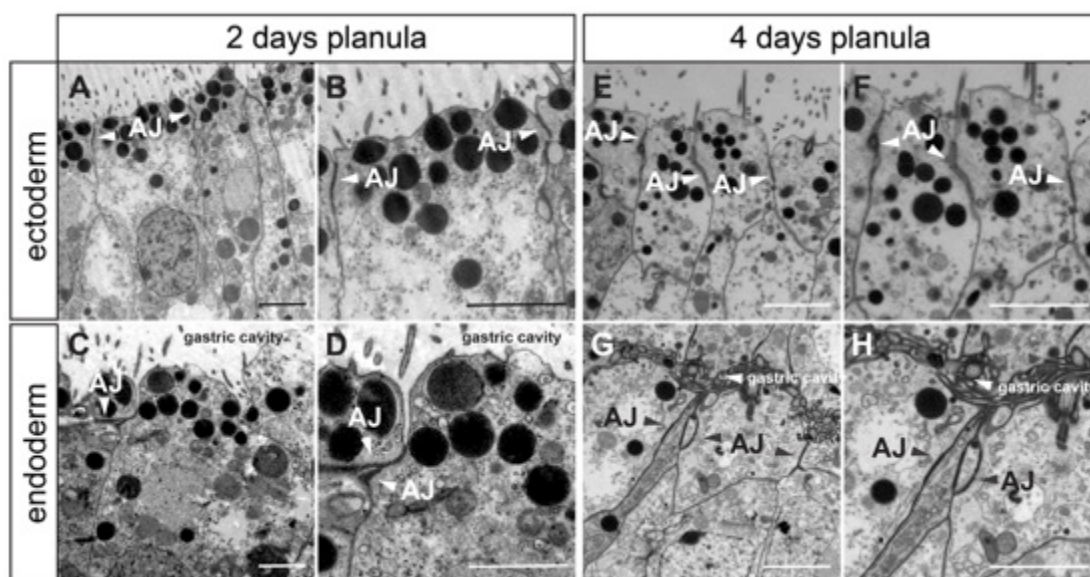

**Fig. S7. TEM of the apical adherens junctions of the ectoderm and the endoderm.** (A,B) ectoderm, 2 dpf planula; (C,D) endoderm, 2dpf planula; (E,F) ectoderm, 4 dpf planula; (G,H) endoderm, 4 dpf planula. Scale bar 2  $\mu$ m.

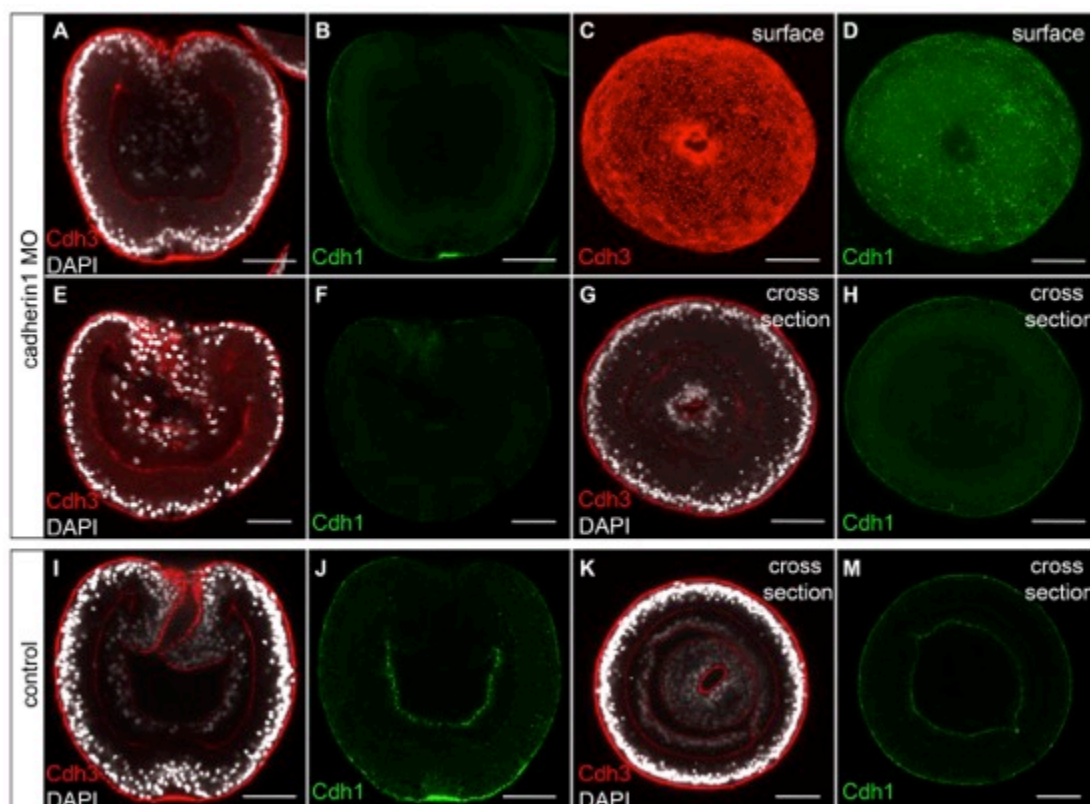

**Fig. S8. Cdh1 and Cdh3 expression upon Cdh1 MO knockdown.** (A-H) Cdh1 MO injected planula. (I-M) Uninjected control planula. Scale bar 50  $\mu$ m.

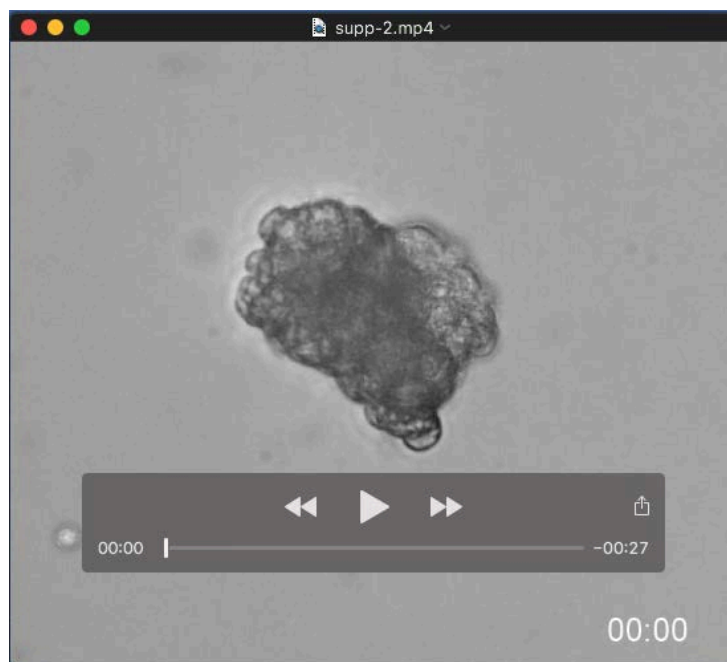

**Movie 1** Std MO aggregate development. Time indicates hours and minutes.

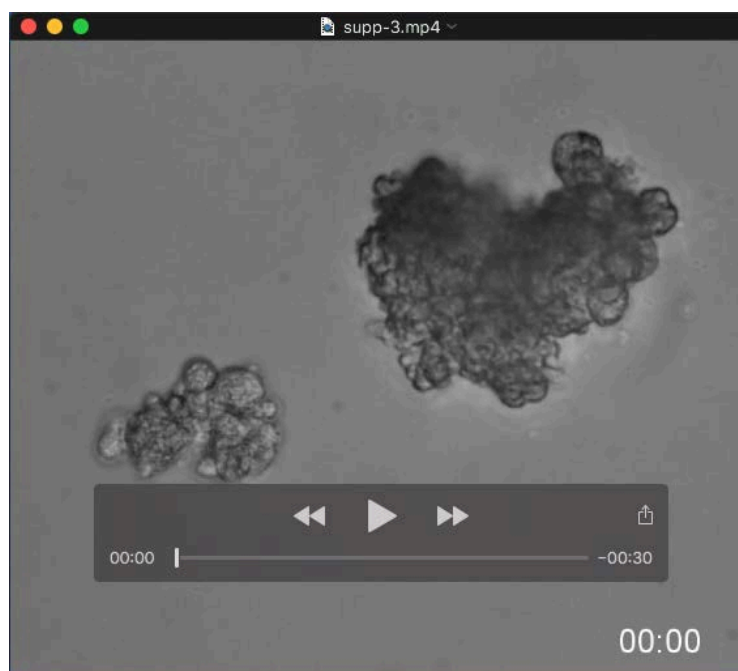

**Movie 2** Cdh3 MO aggregate development. Time indicates hours and minutes.
